# Supplementary material
Source: HighWire-hosted journal article supplement (http://sti.bmj.com/highwire/filestream/156053/field_highwire_adjunct_files/2/STI_Supplementary_Table_043372.docx)
Supplement: STI_Supplementary_Table_043372.docx [file STI_Supplementary_Table_043372.docx]

| **Parameter** | **Min** | **2.5th percentile** | **Mean** | **97.5th percentile** | **Max** | **Source/Justification** | **Assumed Distribution** |
| --- | --- | --- | --- | --- | --- | --- | --- |
| ***During wound healing*** | | | | | | | |
| Relative chance of HIV *acquisition* per act during wound healing (vs not circumcised). | - | 0.32 | 2.99 | 13.6 | - | Pooled analysis of three RCTs [1]. | Log-normal (mean=1.09; sd=0.89) |
| Relative chance of HIV *transmission* per act during wound healing (vs not circumcised). | - | 1.14 | 3.50 | 10.76 | - | Empirical estimate of rate ratio of HIV transmission over six months, from men who were circumcised in the intervention and resumed sex early versus controls (i.e. men who were not circumcised) [2]. * | Log-normal (mean=1.25; sd=0.57) |
| Mean duration of wound healing period (days) | 9 | - | 14 | - | 21 | Exponential waiting-time distribution fitted to empirical observation from Rakai trial [3]. (95% healed within 6 weeks). Range chosen arbitrarily to support durations 5 days longer or shorter.* | Uniform(10,30) |
| Fraction of males that have sex during the wound healing period. | 0.03 | 0.04 | 0.13 | 0.22 | 0.23 | Pooled analysis of three RCTs [1]. | Uniform(0.03,0.23) |
| ***After wound healing*** | | | | | | | |
| Relative chance of HIV *acquisition* per act for circumcised men (vs not circumcised). | - | 0.24 | 0.35 | 0.54 | - | As-treated meta-analysis of three trials give mean and 95% confidence interval of effect of 0.35 (0.24-0.54) [4] . Functional distribution of prior has this mean and ~95% of values lie inside the 95% confidence interval. * | Log-normal (mean=-1.04; sd=0.20) |
| Relative chance of HIV *transmission* per act for circumcised men (vs not circumcised). (From two years after operation). | - | 0.31 | 0.54 | 0.96 | - | Meta-analysis of Partners in Prevention [5] and Rakai observational data [6] (see text for details).* | Log-normal (mean=-0.62; sd=0.29) |

**Table S1: Parameter values used in the model to specify the effect of circumcision.**

*Distributions were derived for the uncertainty analysis and were fitted to match the point estimate of the observation and so that 95% of the distribution coincided with the 95% confidence interval of the estimate.

**References**

1. Mehta SD, Gray RH, Auvert B, Moses S, Kigozi G, Taljaard D*, et al.* **Does sex in the early period after circumcision increase HIV-seroconversion risk? Pooled analysis of adult male circumcision clinical trials**. *AIDS* 2009.

2. Wawer MJ, Makumbi F, Kigozi G, Serwadda D, Watya S, Nalugoda F*, et al.* **Circumcision in HIV-infected men and its effect on HIV transmission to female partners in Rakai, Uganda: a randomised controlled trial**. *Lancet* 2009,374:229-237.

3. Kigozi G, Gray RH, Wawer MJ, Serwadda D, Makumbi F, Watya S*, et al.* **The safety of adult male circumcision in HIV-infected and uninfected men in Rakai, Uganda**. *PLoS Med* 2008,5:e116.

4. Weiss HA, Halperin D, Bailey RC, Hayes RJ, Schmid G, Hankins CA. **Male circumcision for HIV prevention: from evidence to action?** *AIDS* 2008,22:567-574.

5. Baeten J, Donnell D, Inamboa M, John-Stewart G, Kapiga S, Manongi R*, et al.* **Male Circumcision and Risk of Male-to-Female HIV-1 Transmission: A Multinational Prospectiv Study**. In: *5th International AIDS Society Conference on HIV Pathogenesis, Treatment and Prevention*. Cape Town, South Africa; 2009.

6. Gray RH, Kiwanuka N, Quinn TC, Sewankambo NK, Serwadda D, Mangen FW*, et al.* **Male circumcision and HIV acquisition and transmission: cohort studies in Rakai, Uganda. Rakai Project Team**. *AIDS* 2000,14:2371-2381.
